# Supplementary material
Source: Springer Nature journal article supplement (https://www.springermedizin.de/resource/supplementary/12933_2011_416_MOESM3_ESM.pdf/9538128)

### A. Fasting glucose

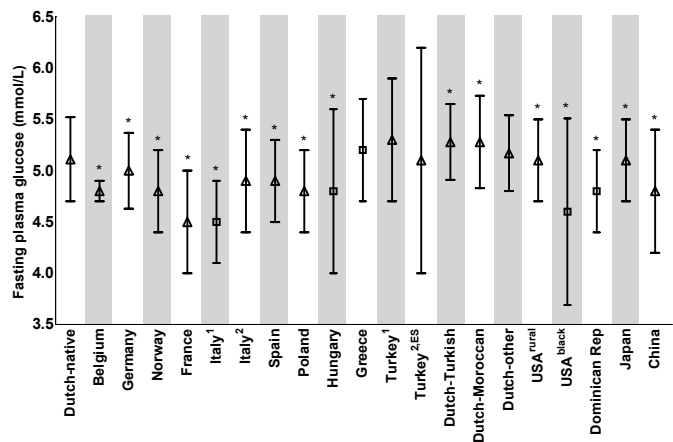

### B. Triglycerides

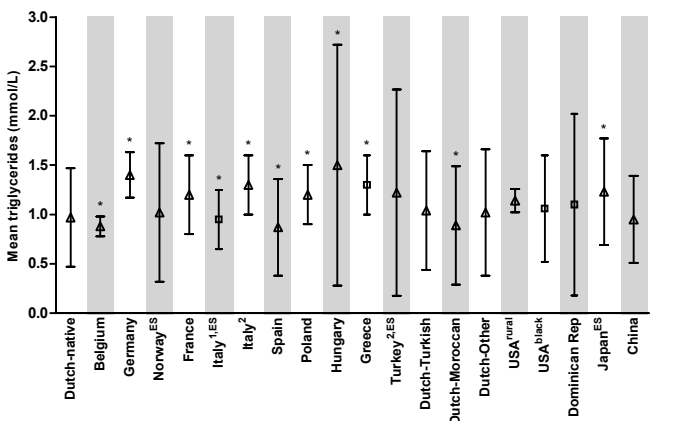

### C. HDL-cholesterol

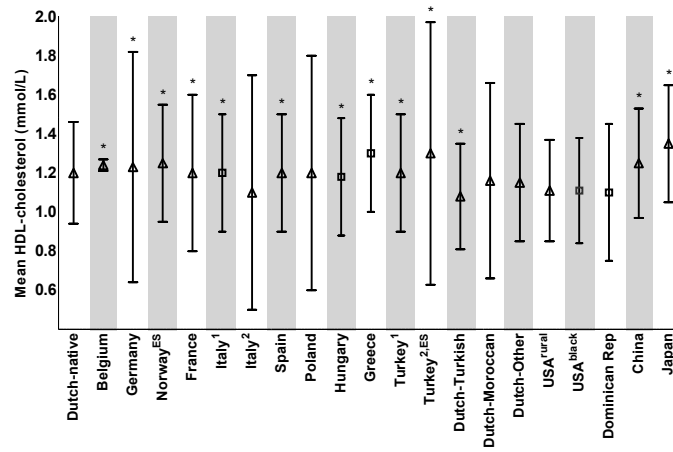

### D. Systolic/diastolic blood pressure

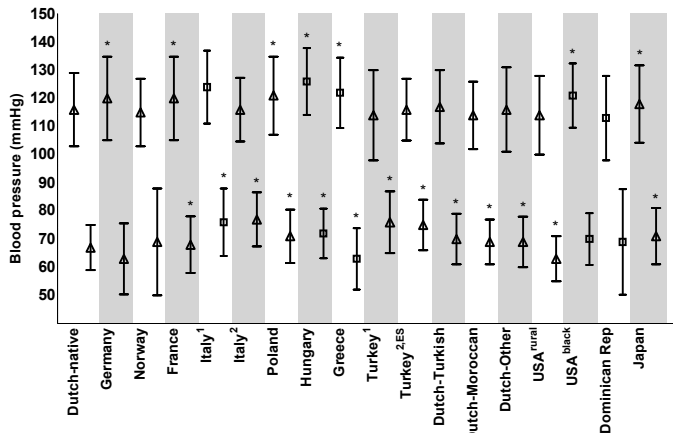

Supplement: MOESM3 [file 9538128]
